# Supplementary material for: Insights into Inflammatory Priming of Adipose-Derived Mesenchymal Stem Cells: Validation of Extracellular Vesicles-Embedded miRNA Reference Genes as A Crucial Step for Donor Selection
Source: PubMed Central journal article supplement (PMC6523846; doi:10.3390/cells8040369), 2019-04-23
Supplement: cells-08-00369-s001.pdf [file cells-08-00369-s001.pdf]

**Supplementary Table S1.** Crt values of scored miRNAs after miR-26a-5p and miR-16-5p normalization.

|             | iASC-EVs 01 | iASC-EVs 02 | iASC-EVs 03 | iASC-EVs 04 | iASC-EVs 05 | Mean  | Process [33] |
|-------------|-------------|-------------|-------------|-------------|-------------|-------|--------------|
| miR-24-3p   | 8.44        | 8.01        | 8.28        | 8.52        | 7.52        | 8.15  | P            |
| miR-125b-5p | 8.01        | 8.24        | 8.28        | 8.57        | 8.33        | 8.29  | D            |
| miR-222-3p  | 8.51        | 9.27        | 9.69        | 9.49        | 8.99        | 9.19  | P            |
| miR-21-5p   | 9.32        | 9.61        | 9.26        | 9.52        | 9.77        | 9.50  | D            |
| miR-193b-3p | 10.38       | 9.80        | 9.85        | 10.41       | 9.20        | 9.93  | P            |
| miR-100-5p  | 10.23       | 10.91       | 11.12       | 10.95       | 10.32       | 10.71 | D            |
| miR-30b-5p  | 11.76       | 11.02       | 11.09       | 11.40       | 11.28       | 11.31 | D            |
| miR-29a-3p  | 10.30       | 11.74       | 11.64       | 11.69       | 11.59       | 11.39 | P            |
| miR-92a-3p  | 12.69       | 11.41       | 11.02       | 11.94       | 11.21       | 11.65 | P            |
| miR-19b-3p  | 11.19       | 12.04       | 11.72       | 12.15       | 11.89       | 11.80 | D            |
| miR-26a-5p  | 12.23       | 12.35       | 12.28       | 12.13       | 12.07       | 12.21 | P            |
| miR-34a-5p  | 12.27       | 12.24       | 12.36       | 13.03       | 11.93       | 12.37 | D            |
| miR-199a-3p | 12.93       | 12.32       | 12.44       | 12.46       | 12.10       | 12.45 | P            |
| miR-130a-3p | 12.33       | 12.57       | 12.84       | 13.03       | 12.18       | 12.59 | P            |
| miR-30a-5p  | 12.55       | 12.85       | 12.30       | 12.65       | 13.32       | 12.73 | P            |
| miR-152-3p  | 12.77       | 13.11       | 13.28       | 13.56       | 12.71       | 13.09 | P            |
| miR-210-3p  | 13.37       | 13.41       | 13.09       | 13.35       | 12.66       | 13.17 | P            |
| miR-320a-3p | 13.30       | 13.24       | 13.10       | 13.29       | 13.21       | 13.23 | P            |
| miR-17-5p   | 13.04       | 13.90       | 13.35       | 13.59       | 13.24       | 13.42 | P            |
| miR-16-5p   | 13.47       | 13.35       | 13.42       | 13.57       | 13.63       | 13.49 | D            |
| miR-27a-3p  | 14.66       | 13.34       | 14.02       | 14.28       | 14.00       | 14.06 | P            |
| miR-138-5p  | 13.72       | 14.31       | 15.46       | 15.14       | 13.13       | 14.35 | D            |
| miR-26b-5p  | 14.53       | 14.81       | 14.62       | 14.62       | 14.25       | 14.57 | P            |
| miR-181a-5p | 14.40       | 15.35       | 15.59       | 14.81       | 13.23       | 14.67 | D            |
| miR-27b-3p  | 15.36       | 14.30       | 14.81       | 15.27       | 14.77       | 14.90 | P            |
| miR-370-3p  | 16.02       | 15.22       | 15.65       | 16.02       | 15.24       | 15.63 | P            |
| miR-483-5p  | 17.67       | 14.25       | 15.63       | 17.11       | 14.73       | 15.88 | D            |
| miR-411-5p  | 15.99       | 15.93       | 16.15       | 15.58       | 15.86       | 15.90 | P            |
| miR-148a-3p | 16.21       | 15.83       | 15.67       | 16.12       | 16.20       | 16.00 | P            |
| miR-23a-3p  | 15.48       | 15.94       | 16.51       | 16.60       | 16.11       | 16.13 | D            |
| miR-19a-3p  | 16.25       | 17.24       | 16.94       | 17.44       | 17.18       | 17.01 | P            |
| miR-155-5p  | 17.18       | 19.12       | 18.27       | 17.52       | 18.54       | 18.12 | P            |
| miR-149-5p  | 19.03       | 17.48       | 17.73       | 18.59       | 18.07       | 18.18 | P            |
| miR-203a-3p | 20.83       | 19.30       | 20.08       | 19.56       | 20.10       | 19.97 | D            |
| miR-18a-5p  | 19.69       | 20.18       | 19.57       | 20.40       | 20.09       | 19.99 | D            |
| miR-502-5p  | 19.42       | 20.87       | 21.24       | 20.29       | 19.92       | 20.35 | P            |
| miR-140-5p  | 19.63       | 20.36       | 21.74       | 20.99       | 19.29       | 20.40 | P            |
| miR-139-5p  | 20.78       | 20.44       | 20.49       | 20.57       | 20.18       | 20.49 | D            |
| miR-101-3p  | 19.94       | 21.06       | 20.95       | 20.71       | 21.01       | 20.73 | D            |
| miR-373-3p  | 22.22       | 22.98       | 22.46       | 18.80       | 17.94       | 20.88 | P            |
| miR-381-3p  | 21.39       | 20.38       | 20.49       | 22.21       | 21.53       | 21.20 | D            |
| miR-223-3p  | 22.53       | 20.84       | 20.97       | 22.07       | 19.58       | 21.20 | D            |
| miR-216b-5p | 25.00       | 23.79       | 22.46       | 17.66       | 23.21       | 22.42 | D            |
| miR-302b-3p | 23.45       | 23.79       | 20.21       | 23.81       | 22.67       | 22.79 | D            |
| miR-142-3p  | 24.63       | 23.30       | 22.46       | 23.81       | 23.21       | 23.48 | P            |
| miR-127-5p  | 24.82       | 23.79       | 22.46       | 23.81       | 23.21       | 23.62 | P            |

Color code represents quartiles of expression. P stands for cartilage-protective mechanisms and D for cartilage-destructive mechanisms involvement.

**Supplementary Table S2.** Magnification of miRNA lists as per heat maps in Figure 3A.

| <b>miR-26a-5p/16-5p</b> | <b>miR-103a-3p/425-5p</b> |
|-------------------------|---------------------------|
| miR-18a-5p              | miR-373-3p                |
| miR-30a-5p              | miR-216b-5p               |
| miR-21-5p               | miR-155-5p                |
| miR-155-5p              | miR-181a-5p               |
| miR-17-5p               | miR-502-5p                |
| miR-29a-3p              | miR-140-5p                |
| miR-101-3p              | miR-138-5p                |
| miR-125b-5p             | miR-19a-3p                |
| miR-19a-3p              | miR-19b-3p                |
| miR-19b-3p              | miR-29a-3p                |
| miR-373-3p              | miR-101-3p                |
| miR-26a-5p              | miR-17-5p                 |
| miR-26b-5p              | miR-125b-5p               |
| miR-181a-5p             | miR-34a-5p                |
| miR-34a-5p              | miR-130a-3p               |
| miR-23a-3p              | miR-152-3p                |
| miR-130a-3p             | miR-23a-3p                |
| miR-152-3p              | miR-222-3p                |
| miR-140-5p              | miR-100-5p                |
| miR-138-5p              | miR-302b-3p               |
| miR-502-5p              | miR-381-3p                |
| miR-222-3p              | miR-148a-3p               |
| miR-100-5p              | miR-320a-3p               |
| miR-411-5p              | miR-16-5p                 |
| miR-216b-5p             | miR-30a-5p                |
| miR-148a-3p             | miR-18a-5p                |
| miR-381-3p              | miR-21-5p                 |
| miR-16-5p               | miR-203a-3p               |
| miR-92a-3p              | miR-483-5p                |
| miR-127-5p              | miR-149-5p                |
| miR-142-3p              | miR-30b-5p                |
| miR-320a-3p             | miR-27b-3p                |
| miR-302b-3p             | miR-27a-3p                |
| miR-210-3p              | miR-127-5p                |
| miR-199a-3p             | miR-92a-3p                |
| miR-139-5p              | miR-142-3p                |
| miR-24-3p               | miR-26a-5p                |
| miR-193b-3p             | miR-210-3p                |
| miR-223-3p              | miR-26b-5p                |
| miR-203a-3p             | miR-223-3p                |
| miR-370-3p              | miR-370-3p                |
| miR-483-5p              | miR-193b-3p               |
| miR-149-5p              | miR-24-3p                 |
| miR-30b-5p              | miR-199a-3p               |
| miR-27b-3p              | miR-411-5p                |
| miR-27a-3p              | miR-139-5p                |
